# Supplementary material for: Episodic memory and delayed recall are significantly more impaired in younger patients with deficit schizophrenia than in elderly patients with amnestic mild cognitive impairment
Source: PubMed Central journal article supplement (PMC5953437; doi:10.1371/journal.pone.0197004), 2018-05-15

**Episodic memory and delayed recall are significantly more impaired in younger patients with deficit schizophrenia than in elderly patients with amnesic mild cognitive impairment.**

Short title: deficit schizophrenia and mild cognitive impairment

Burane Kanchanatawan\*, Sookjaroen Tangwongchai\*, Thitiporn Supasitthumrong, Sira Sriswasdi, Michael Maes. \*Shared first authorsip

## **S2\_File. Forest and Linear Support Vector Machine (Linear SVM) models**

Random Forest predicted class probabilities and Linear SVM distances to decision boundary for amnesic mild cognitive impairment (aMCI) versus nondesic schizophrenia (SCZ). Lower scores (probabilities or distances) are associated with aMCI.

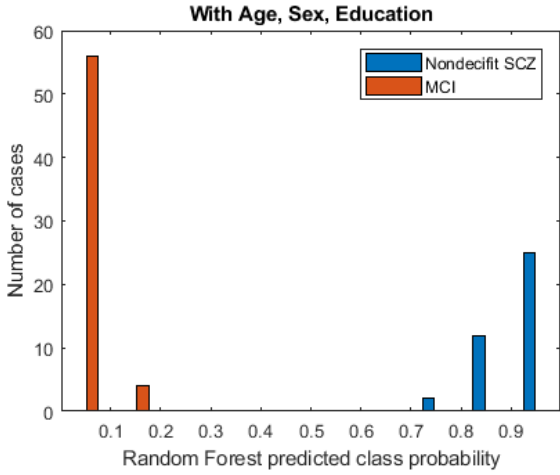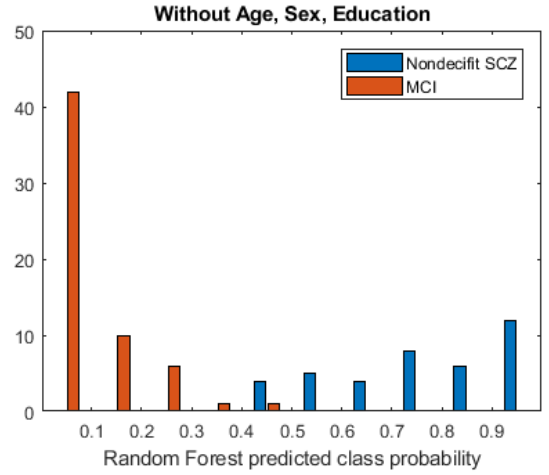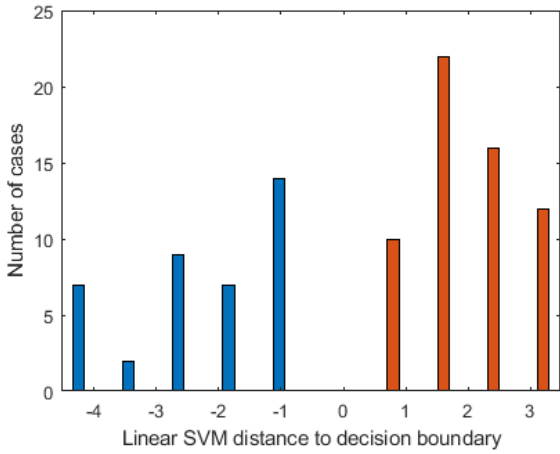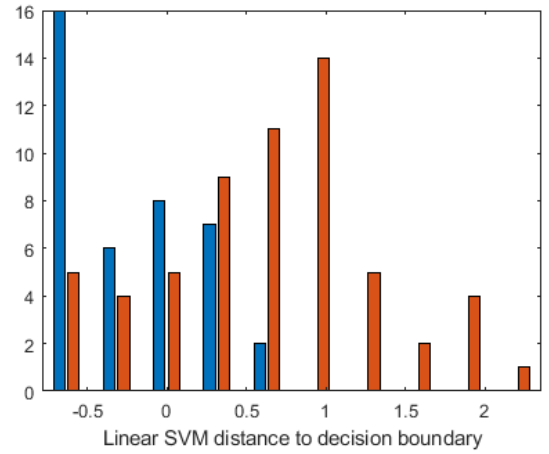

Supplement: pone.0197004.s002.pdf [file pone.0197004.s002.pdf]
