# Supplementary material for: Episodic memory and delayed recall are significantly more impaired in younger patients with deficit schizophrenia than in elderly patients with amnestic mild cognitive impairment
Source: PubMed Central journal article supplement (PMC5953437; doi:10.1371/journal.pone.0197004), 2018-05-15
Supplement: pone.0197004.s003.pdf [file pone.0197004.s003.pdf]

**Episodic memory and delayed recall are significantly more impaired in younger patients with deficit schizophrenia than in elderly patients with amnesic mild cognitive impairment.**

Short title: deficit schizophrenia and mild cognitive impairment

Burane Kanchanatawan,\* Sookjaroen Tangwongchai, \* Thitiporn Supasitthumrong, Sira Sriswasdi, Michael Maes

\* shared first authorship

### **Neural Network Analysis: Deficit schizophrenia versus aMCI**

Shown are the results of Multilayer Perceptron Neural Network analysis with network information, model summary, parameter estimates, and input variable importance.

#### **Network Information**

|             |            |   |          |
|-------------|------------|---|----------|
| Input Layer | Covariates | 1 | VFT      |
|             |            | 2 | BNTtotal |
|             |            | 3 | MMSE     |
|             |            | 4 | WLM      |

|                 |                                                |                    |
|-----------------|------------------------------------------------|--------------------|
|                 | 5                                              | WL True Recall     |
|                 | 6                                              | WL False Recall    |
|                 | 7                                              | WL Recognition     |
|                 | Number of Units <sup>a</sup>                   | 7                  |
|                 | Rescaling Method for Covariates                | Standardized       |
| Hidden Layer(s) | Number of Hidden Layers                        | 2                  |
|                 | Number of Units in Hidden Layer 1 <sup>a</sup> | 4                  |
|                 | Number of Units in Hidden Layer 2 <sup>a</sup> | 3                  |
|                 | Activation Function                            | Hyperbolic tangent |
| Output Layer    | Dependent Variables 1                          | deficit_MCI        |
|                 | Number of Units                                | 2                  |
|                 | Activation Function                            | Softmax            |
|                 | Error Function                                 | Cross-entropy      |

a. Excluding the bias unit

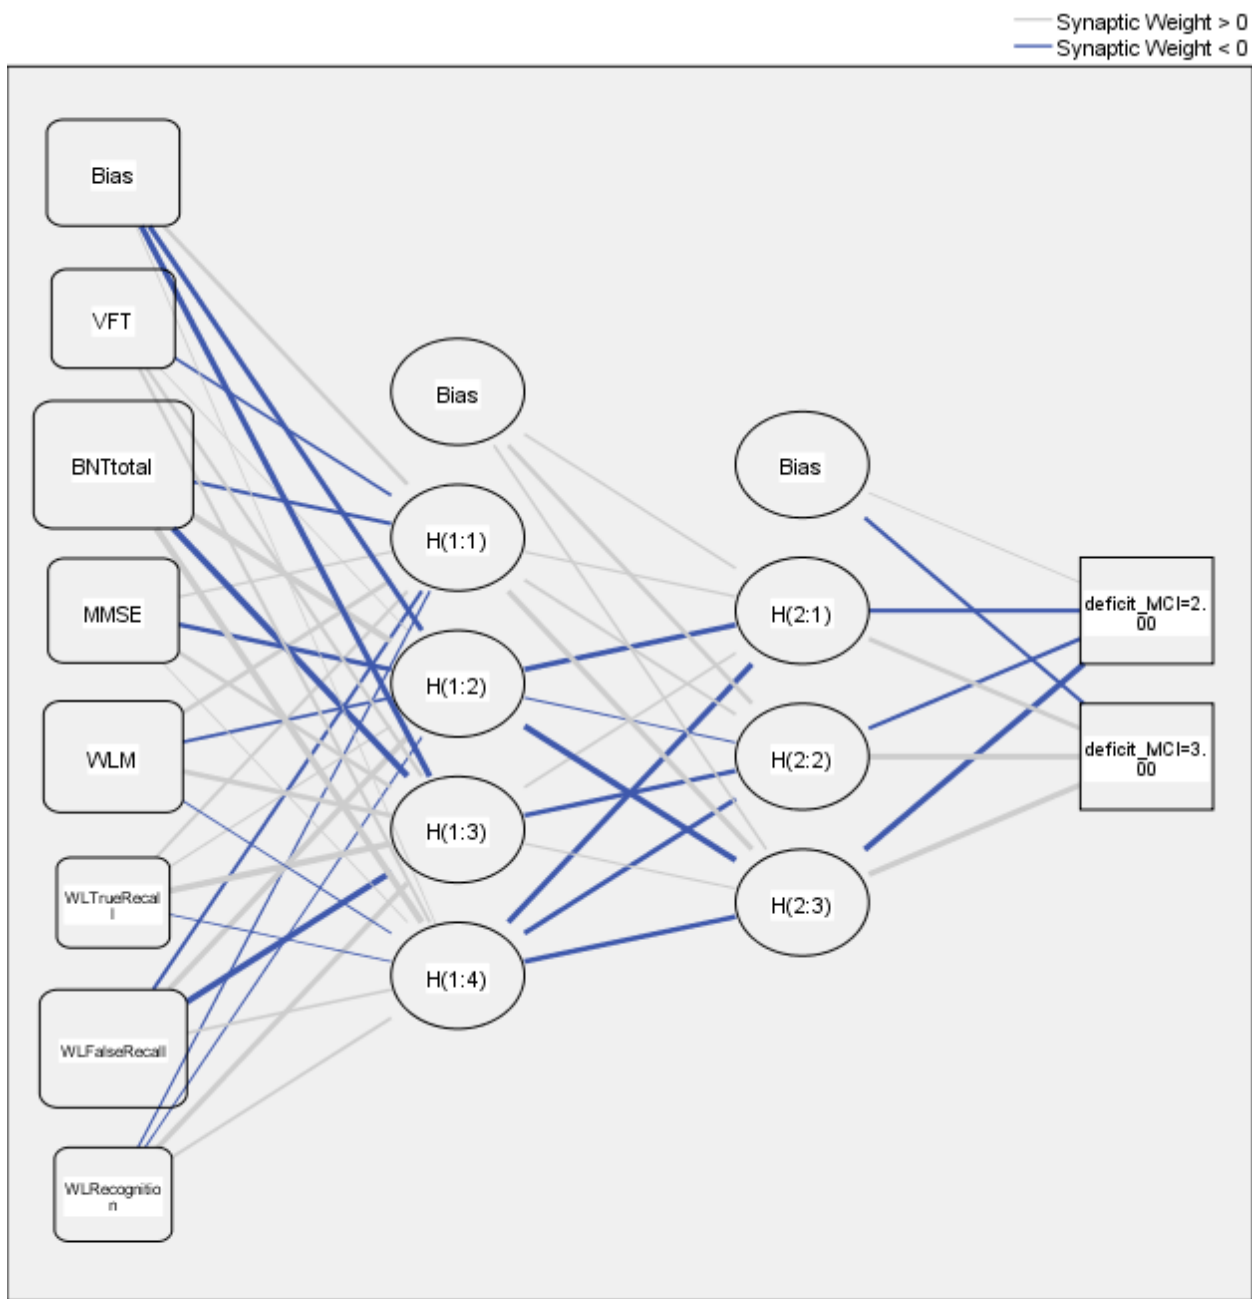

Hidden layer activation function: Hyperbolic tangent

Output layer activation function: Softmax

### Model Summary

|          |                               |                                                                    |
|----------|-------------------------------|--------------------------------------------------------------------|
| Training | Cross Entropy Error           | 16.488                                                             |
|          | Percent Incorrect Predictions | 20.0%                                                              |
|          | Stopping Rule Used            | 1 consecutive<br>step(s) with no<br>decrease in error <sup>a</sup> |
|          | Training Time                 | 0:00:00.01                                                         |
| Testing  | Cross Entropy Error           | 5.288                                                              |
|          | Percent Incorrect Predictions | 13.3%                                                              |
| Holdout  | Percent Incorrect Predictions | 20.0%                                                              |

Dependent Variable: deficit\_MCI

a. Error computations are based on the testing sample.

### Parameter Estimates

| Predictor      |               | Hidden Layer 1 |        |        |        | Predicted |        |        | Output Layer       |                    |
|----------------|---------------|----------------|--------|--------|--------|-----------|--------|--------|--------------------|--------------------|
|                |               | H(1:1)         | H(1:2) | H(1:3) | H(1:4) | H(2:1)    | H(2:2) | H(2:3) | [deficit_MCI=2.00] | [deficit_MCI=3.00] |
| Input Layer    | (Bias)        | .408           | -.612  | -.720  | .055   |           |        |        |                    |                    |
|                | VFT           | -.256          | .047   | .363   | .315   |           |        |        |                    |                    |
|                | BNTtotal      | -.371          | 1.007  | -1.239 | 1.308  |           |        |        |                    |                    |
|                | MMSE          | .196           | -.471  | .431   | .072   |           |        |        |                    |                    |
|                | WLM           | .436           | -.298  | .548   | -.101  |           |        |        |                    |                    |
|                | WLTrueRecall  | .309           | .163   | 1.105  | -.074  |           |        |        |                    |                    |
|                | WLFalseRecall | -.346          | .671   | -.933  | .258   |           |        |        |                    |                    |
|                | WLRecognition | -.183          | -.153  | .614   | .286   |           |        |        |                    |                    |
| Hidden Layer 1 | (Bias)        |                |        |        |        | .219      | .435   | .229   |                    |                    |
|                | H(1:1)        |                |        |        |        | .189      | .258   | .646   |                    |                    |
|                | H(1:2)        |                |        |        |        | -.620     | -.144  | -.795  |                    |                    |
|                | H(1:3)        |                |        |        |        | .241      | -.449  | .176   |                    |                    |
|                | H(1:4)        |                |        |        |        | -.650     | -.509  | -.555  |                    |                    |
| Hidden Layer 2 | (Bias)        |                |        |        |        |           |        |        | .100               | -.367              |
|                | H(2:1)        |                |        |        |        |           |        |        | -.398              | .440               |
|                | H(2:2)        |                |        |        |        |           |        |        | -.378              | .780               |
|                | H(2:3)        |                |        |        |        |           |        |        | -.734              | .679               |

### Independent Variable Importance

|                 | Importance | Normalized<br>Importance |
|-----------------|------------|--------------------------|
| VFT             | .092       | 32.3%                    |
| BNTtotal        | .285       | 100.0%                   |
| MMSE            | .130       | 45.7%                    |
| WLM             | .177       | 61.9%                    |
| WL True Recall  | .035       | 12.3%                    |
| WL False Recall | .220       | 77.3%                    |
| WLRecognition   | .060       | 21.1%                    |
