# Supplementary material for: Episodic memory and delayed recall are significantly more impaired in younger patients with deficit schizophrenia than in elderly patients with amnestic mild cognitive impairment
Source: PubMed Central journal article supplement (PMC5953437; doi:10.1371/journal.pone.0197004), 2018-05-15
Supplement: pone.0197004.s004.pdf [file pone.0197004.s004.pdf]

**Episodic memory and delayed recall are significantly more impaired in younger patients with deficit schizophrenia than in elderly patients with amnesic mild cognitive impairment.**

Short title: deficit schizophrenia and mild cognitive impairment

Burane Kanchanatawan, \* Sookjaroen Tangwongchai, \* Thitiporn Supasitthumrong, Sira Sriswasdi, Michael Maes

\* shared first authorship

Supplementary Material

**Neural Network Analysis: Separation Non-deficit schizophrenia and aMCI**

Shown are the results of Multilayer Perceptron Neural Network analysis with network information, model summary, parameter estimates, and input variable importance.

### Network Information

|                                 |                                                |              |                    |
|---------------------------------|------------------------------------------------|--------------|--------------------|
| Input Layer                     | Covariates                                     | 1            | VFT                |
|                                 |                                                | 2            | BNTtotal           |
|                                 |                                                | 3            | MMSE               |
|                                 |                                                | 4            | WLM                |
|                                 |                                                | 5            | WL True Recall     |
|                                 |                                                | 6            | WL False Recall    |
|                                 |                                                | 7            | WLRecognition      |
| Number of Units <sup>a</sup>    |                                                | 7            |                    |
| Rescaling Method for Covariates |                                                | Standardized |                    |
| Hidden Layer(s)                 | Number of Hidden Layers                        |              | 2                  |
|                                 | Number of Units in Hidden Layer 1 <sup>a</sup> |              | 3                  |
|                                 | Number of Units in Hidden Layer 2 <sup>a</sup> |              | 2                  |
|                                 | Activation Function                            |              | Hyperbolic tangent |
| Output Layer                    | Dependent Variables                            | 1            | nondeficit_mci     |
|                                 | Number of Units                                |              | 2                  |
|                                 | Activation Function                            |              | Identity           |
|                                 | Error Function                                 |              | Sum of Squares     |

a. Excluding the bias unit

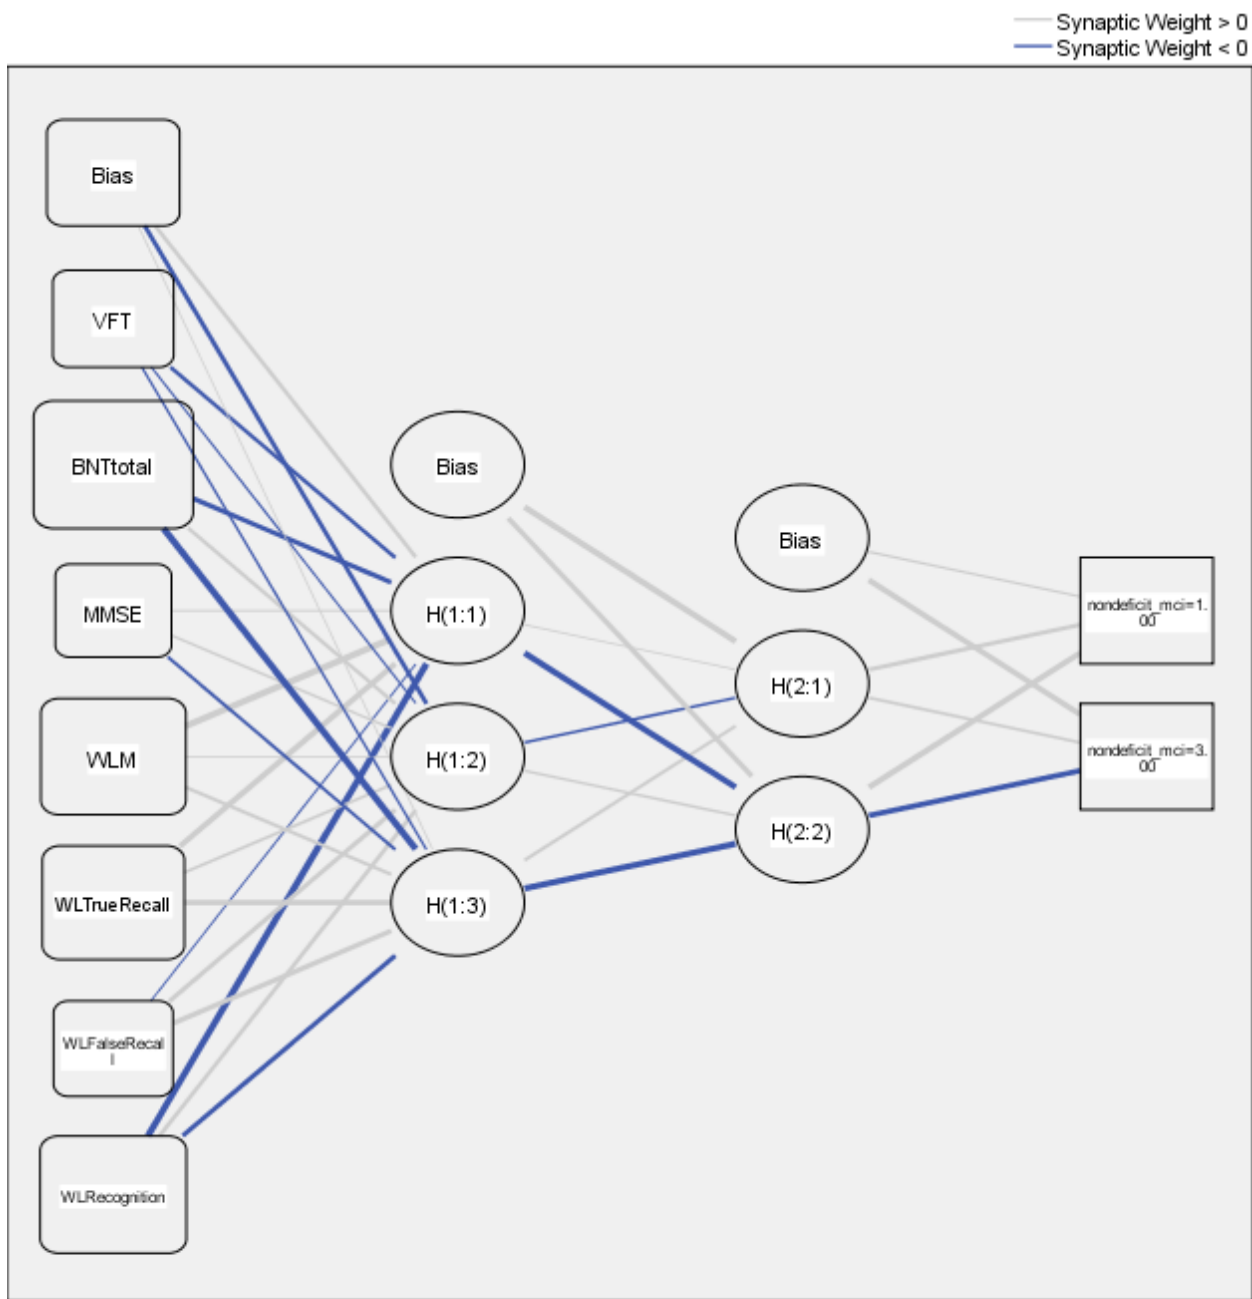

Hidden layer activation function: Hyperbolic tangent

Output layer activation function: Identity

### Model Summary

|          |                               |                                                                    |
|----------|-------------------------------|--------------------------------------------------------------------|
| Training | Sum of Squares Error          | 6.176                                                              |
|          | Percent Incorrect Predictions | 23.9%                                                              |
|          | Stopping Rule Used            | 1 consecutive<br>step(s) with no<br>decrease in error <sup>a</sup> |
|          | Training Time                 | 0:00:00.00                                                         |
| Testing  | Sum of Squares Error          | 2.246                                                              |
|          | Percent Incorrect Predictions | 18.2%                                                              |
| Holdout  | Percent Incorrect Predictions | 25.8%                                                              |

Dependent Variable: nondeficit\_mci

a. Error computations are based on the testing sample.

### Parameter Estimates

| Predictor      | Hidden Layer 1 |        |        | Predicted<br>Hidden Layer 2 |        | Output Layer              |                           |
|----------------|----------------|--------|--------|-----------------------------|--------|---------------------------|---------------------------|
|                | H(1:1)         | H(1:2) | H(1:3) | H(2:1)                      | H(2:2) | [nondeficit_mci=<br>1.00] | [nondeficit_mci=3<br>.00] |
| Input Layer    | (Bias)         | .313   | -.362  | .008                        |        |                           |                           |
|                | VFT            | -.293  | -.077  | -.134                       |        |                           |                           |
|                | BNTtotal       | -.417  | .287   | -1.064                      |        |                           |                           |
|                | MMSE           | .069   | .198   | -.222                       |        |                           |                           |
|                | WLM            | .777   | .062   | .265                        |        |                           |                           |
|                | WLTrueRecall   | .558   | .211   | .465                        |        |                           |                           |
|                | WLFalseRecall  | -.062  | .394   | .424                        |        |                           |                           |
|                | WLRecognition  | -.799  | .323   | -.415                       |        |                           |                           |
| Hidden Layer 1 | (Bias)         |        |        | .699                        | .441   |                           |                           |
|                | H(1:1)         |        |        | .030                        | -.736  |                           |                           |
|                | H(1:2)         |        |        | -.200                       | .199   |                           |                           |
|                | H(1:3)         |        |        | .252                        | -.750  |                           |                           |
| Hidden Layer 2 | (Bias)         |        |        |                             |        | .118                      | .537                      |
|                | H(2:1)         |        |        |                             |        | .327                      | .221                      |
|                | H(2:2)         |        |        |                             |        | .565                      | -.518                     |

### Independent Variable Importance

|                 | Importance | Normalized Importance |
|-----------------|------------|-----------------------|
| VFT             | .071       | 27.4%                 |
| BNTtotal        | .259       | 100.0%                |
| MMSE            | .048       | 18.5%                 |
| WLM             | .189       | 72.8%                 |
| WL True Recall  | .174       | 67.0%                 |
| WL False Recall | .063       | 24.4%                 |
| WLRecognition   | .196       | 75.4%                 |
